# Supplementary material for: Evaluating and analyzing student labor literacy in China's higher vocational education: an assessment model approach
Source: Frontiers journal article supplement (doi:10.3389/feduc.2024.1361224), 2024-02-23
Supplement: Data_Sheet_1.PDF [file Data_Sheet_1.PDF]

# Survey on Labor Literacy Among Students<sup>1</sup>

Dear Student,

Hello! Thank you for taking time from your busy academic schedule to participate in this labor literacy survey. The purpose of this survey is to accurately understand the current state of labor literacy among university students and identify any existing issues. We will ensure the confidentiality of your responses, and the survey data will be used solely for research purposes. Please answer truthfully based on your own circumstances. Thank you!

## Section A: Basic Information

A1. Gender [Single Choice Question] \*

- ☐ Male
- ☐ Female

A2. Grade [Single Choice Question] \*

- ☐ First Year
- ☐ Second Year
- ☐ Third Year

A3. Major [Single Choice Question] \*

- ☐ Arts and Humanities
- ☐ Science and Engineering
- ☐ Economics and Management
- ☐ Medical
- ☐ Art

---

<sup>1</sup> This is a translated version, the original survey was conducted in Chinese.

- ☐ Other

A4. Your Political Affiliation [Single Choice Question] \*

- ☐ CPC Member (including preparatory)
- ☐ Party Activist
- ☐ Youth League Member
- ☐ Masses
- ☐ Other

A5. Your Household Registration Type [Single Choice Question] \*

- ☐ Agricultural
- ☐ Non-agricultural (including urban, collective, etc.)
- ☐ Not sure

A6. Your Hometown Location [Single Choice Question] \*

- ☐ City
- ☐ County
- ☐ Town
- ☐ Rural Area

A7. Has your school conducted physical fitness tests? Have you passed? [Single Choice Question] \*

- ☐ Conducted and passed
- ☐ Conducted but not passed
- ☐ Not conducted
- ☐ Not sure

A8. How is your academic performance? [Single Choice Question] \*

- ☐ GPA ranked in the top 25%
- ☐ GPA ranked 25%-50%
- ☐ GPA ranked 50%-75%
- ☐ GPA ranked in the bottom 25%

A9. Do you have experience as a student leader? [Single Choice Question] \*

- ☐ Yes
- ☐ No

A10. Your father's occupation [Single Choice Question] \*

- ☐ Leaders and staff of state organs and institutions
- ☐ Senior management of enterprises/companies
- ☐ Teachers, engineers, doctors, lawyers
- ☐ Technical workers (including drivers)
- ☐ General staff in production and manufacturing
- ☐ General staff in commercial and service industry
- ☐ Individual business owners
- ☐ Farmers
- ☐ Unemployed
- ☐ Others

A11. Your mother's occupation [Single Choice Question] \*

- ☐ Leaders and staff of state organs and institutions
- ☐ Senior management of enterprises/companies
- ☐ Teachers, engineers, doctors, lawyers
- ☐ Technical workers (including drivers)
- ☐ General staff in production and manufacturing
- ☐ General staff in commercial and service industry

- ☐ Individual business owners
- ☐ Farmers
- ☐ Unemployed
- ☐ Others

A12. How hard do you think your father's work is? [Fill in the blank] \*

Rate on a scale of 1-5 (1 being very easy, 5 being very hard).

A13. How hard do you think your mother's work is? [Fill in the blank] \*

Rate on a scale of 1-5 (1 being very easy, 5 being very hard).

A14. Your father's education level [Single Choice Question] \*

- ☐ Graduate and above
- ☐ Bachelor's degree
- ☐ Associate degree
- ☐ High school
- ☐ Technical school/Vocational high school
- ☐ Middle school and below

A15. Your mother's education level [Single Choice Question] \*

- ☐ Graduate and above
- ☐ Bachelor's degree
- ☐ Associate degree
- ☐ High school
- ☐ Technical school/Vocational high school
- ☐ Middle school and below

A16. Who do you live with at home? [Multiple Choice Question] \*

- ☐ Father
- ☐ Mother
- ☐ Grandparents
- ☐ Other relatives

A17. How many siblings do you have? [Fill in the blank] \*

A18. What is your rank among your siblings? (In order of age, only child should fill in 1)  
[Fill in the blank] \*

A19. Your monthly living expenses [Fill in the blank] \*

A20. Does your school carry out labor education? [Single Choice Question] \*

- ☐ Yes
- ☐ No

A21. Your School's Labor Course Format and Textbook Situation [Single Choice Question]  
\*

- ☐ Compulsory course with textbook
- ☐ Elective course without textbook
- ☐ Major course involving labor knowledge
- ☐ Textbook available but no course

A22. Courses Where Teachers Discuss Labor-Related Content (Multiple Choice) [Multiple  
Choice Question] \*

- ☐ Ideological and Political Theory Course
- ☐ Culture and Major Courses
- ☐ Internship and Practical Training Courses
- ☐ Innovation and Entrepreneurship Courses

☐ Others

A23. Labor Education Teaching Models Encountered at Your School [Single Choice Question] \*

- ☐ Traditional Classroom Teaching Model
- ☐ Online Independent Learning Model
- ☐ Labor Practice Education Model
- ☐ Combination of Teaching and Practice Model
- ☐ Unclear or Unknown

A24. Forms of Labor Practice Activities at Your School [Single Choice Question] \*

- ☐ "Labor Month," "Labor Week," work-study, and other daily living labor
- ☐ Service-oriented labor mainly in the form of volunteer service (e.g., going to the countryside, community service)
- ☐ Production labor related to major, such as internships, innovation and entrepreneurship, and social practice
- ☐ Others

A25. Does Your School Have Labor Education Practice Bases? [Single Choice Question] \*

- ☐ In-school labor education practice base
- ☐ Off-campus partnership base
- ☐ Both in-school and off-campus labor education practice bases
- ☐ Unsure

A26. Does Your School Have Internship and Training Sites? [Single Choice Question] \*

- ☐ Yes
- ☐ No
- ☐ Unsure

A27. Frequency of Using Your School's Internship and Training Sites [Single Choice Question] \*

- ☐ Used regularly
- ☐ Used occasionally
- ☐ Hardly ever used

A28. The Situation of Full-time and Part-time Teachers of Labor Education at Your School [Single Choice Question] \*

- ☐ Full-time teachers available
- ☐ Both full-time and part-time teachers available
- ☐ Conducted by counselors or ideological and political teachers
- ☐ None
- ☐ Unsure

A29. The State of Student Labor Literacy Evaluation and Supervision Mechanism at Your School [Single Choice Question] \*

- ☐ Well-developed evaluation and supervision system
- ☐ Average evaluation and supervision system
- ☐ Lacking an evaluation and supervision system
- ☐ No evaluation and supervision system at all

A30. The Method of Labor Literacy Evaluation at Your School [Single Choice Question] \*

- ☐ Final exams for compulsory and elective courses
- ☐ Submission of social practice reports
- ☐ Comprehensive evaluation at the end of a study period

- ☐ Self-evaluation primarily, supplemented by evaluations from teachers, peers, parents, employers, etc.
- ☐ Regular assessment by professional institutions

A31. Your Willingness to Participate in Innovation and Entrepreneurship Competitions  
[Single Choice Question] \*

- ☐ Very willing
- ☐ Quite willing
- ☐ Somewhat willing
- ☐ Unwilling
- ☐ Strongly unwilling

A32. Labor Model Personalities You Know: (Fill in names, write "none" if unknown)  
[Open-ended Question]

A33. The Last Year You Participated in the Following Activities: [Matrix Single Choice Question] \*

|                                                                                         | 2023                  | 2022                  | 2021                  | Before 2021           | Never Participated    |
|-----------------------------------------------------------------------------------------|-----------------------|-----------------------|-----------------------|-----------------------|-----------------------|
| Factory Visit                                                                           | <input type="radio"/> |
| Visit to Farms and Forestry Bases<br>(Agricultural bases, agritainment, etc.)           | <input type="radio"/> |
| Company Visit (Banks, insurance companies, real estate firms, internet companies, etc.) | <input type="radio"/> |
| Volunteer Service Participation                                                         | <input type="radio"/> |
| Participating in physically demanding labor                                             | <input type="radio"/> |
| Cleaning and Hygiene Maintenance                                                        | <input type="radio"/> |

## Section B: Labor Literacy



B1. Identify the unreasonable statement regarding food preparation: [Single Choice Question] \*

- ☐ The way to judge if steamed buns are cooked: the bun is elastic, rebounds quickly after being lightly pressed, and its skin is not sticky.
- ☐ It's safe to heat a whole egg in the microwave.
- ☐ When stir-frying, vegetables should be drained of water before being added to the hot oil.
- ☐ When boiling dumplings, one should first bring a sufficient amount of water to a boil before dispersing the dumplings into the pot.

B2. Regarding courier services, identify the incorrect statement: [Single Choice Question] \*

- ☐ Courier enterprises should not accept parcels with false information on the waybill.
- ☐ Courier enterprises are required to complete deliveries within the promised timeframe.
- ☐ Couriers are not allowed to handle parcels in a manner that endangers their safety, such as throwing or stepping on them.
- ☐ If necessary, couriers may open and inspect others' parcels privately.

B3. What is your attitude towards the following labor-related information encountered while browsing web pages or reading publications? [Matrix Single Choice Question] \*

|                                     | Very much like it     | Somewhat like it      | Neutral               | Somewhat dislike      | Strongly dislike      |
|-------------------------------------|-----------------------|-----------------------|-----------------------|-----------------------|-----------------------|
| Household chores                    | <input type="radio"/> |
| Everyday handicrafts                | <input type="radio"/> |
| Intangible cultural heritage crafts | <input type="radio"/> |
| Industrial production               | <input type="radio"/> |
| Agricultural production             | <input type="radio"/> |

|                    |                       |                       |                       |                       |                       |
|--------------------|-----------------------|-----------------------|-----------------------|-----------------------|-----------------------|
| Volunteer service  | <input type="radio"/> |
| Professional labor | <input type="radio"/> |

B4. What is your attitude towards the following statements? [Matrix Single Choice Question] \*

|                                                                                                                                       | Strongly agree        | Somewhat agree        | Unsure                | Somewhat disagree     | Strongly disagree     |
|---------------------------------------------------------------------------------------------------------------------------------------|-----------------------|-----------------------|-----------------------|-----------------------|-----------------------|
| I feel happy when I tidy up my desk or room.                                                                                          | <input type="radio"/> |
| I'm willing to spend time learning knowledge related to my future profession.                                                         | <input type="radio"/> |
| I prefer doing things by myself.                                                                                                      | <input type="radio"/> |
| I enjoy the process of labor.                                                                                                         | <input type="radio"/> |
| When I see unwashed dishes in the kitchen sink, I will wash them myself.                                                              | <input type="radio"/> |
| When I see garbage in the classroom, I will clean it up myself.                                                                       | <input type="radio"/> |
| When I see a classmate facing a difficult problem, I will proactively offer help, such as being on duty, making bulletin boards, etc. | <input type="radio"/> |
| After trying hard to solve a problem, I will reflect on my process.                                                                   | <input type="radio"/> |
| I labor because I believe it makes life better.                                                                                       | <input type="radio"/> |
| Labor brings me a sense of spiritual satisfaction.                                                                                    | <input type="radio"/> |
| Through labor, I can express my personal value.                                                                                       | <input type="radio"/> |

|                                                   |                       |                       |                       |                       |                       |
|---------------------------------------------------|-----------------------|-----------------------|-----------------------|-----------------------|-----------------------|
| In the process of labor, I can make more friends. | <input type="radio"/> |
|---------------------------------------------------|-----------------------|-----------------------|-----------------------|-----------------------|-----------------------|

B5. What would you do if a button falls off your clothing? [Single Choice Question] \*

- ☐ Sew it back on myself with needle and thread.
- ☐ Give it to parents or other elders and wait for it to be sewn.
- ☐ Take it to a tailor to have it sewn back on.
- ☐ Ignore it and continue to wear the clothing.
- ☐ Discard the clothing.

B6. If a fan at home breaks and a repair person is called, how would you react during the repair process? [Single Choice Question] \*

- ☐ Very willing to participate - warmly welcome and assist the repair person.
- ☐ Somewhat willing to participate - observe and think, asking questions to the repair person.
- ☐ Unsure about participating - quietly observe the repair person's method.
- ☐ Unwilling to participate - glance at it and then do my own thing.
- ☐ Absolutely unwilling to participate - mind my own business and continue with my own activities.

B7. Suppose you bought a bookshelf online that requires self-assembly upon receipt, how would you handle it? [Single Choice Question] \*

- ☐ Very willing to explore assembly - carefully read the instructions and assemble according to the guide.
- ☐ Somewhat willing to explore assembly - try to assemble based on previous experience.
- ☐ Unsure about exploring assembly - try it myself first, seek help if it's too complex.
- ☐ Unwilling to explore assembly - directly ask someone else for help.
- ☐ Absolutely unwilling to explore assembly - set it aside.

B8. When you are alone at home during the summer vacation, what is your usual solution for lunch? [Single Choice Question] \*

- ☐ Cook a simple meal myself.
- ☐ Order takeout or go out to eat.
- ☐ Eat convenience food prepared by parents.
- ☐ Eat at a relative's house.
- ☐ Hire someone to come and cook.

B9. How do you usually manage the following? [Matrix Single Choice Question] \*

|                                                                                    | Always                | Often                 | Sometimes             | Rarely                | Never                 |
|------------------------------------------------------------------------------------|-----------------------|-----------------------|-----------------------|-----------------------|-----------------------|
| Proactively serve tea when guests are at home.                                     | <input type="radio"/> |
| Take the initiative to clean at home or school.                                    | <input type="radio"/> |
| Regularly water plants if I have any.                                              | <input type="radio"/> |
| Turn off the main valve after using gas.                                           | <input type="radio"/> |
| Always use a dry cloth to wipe appliances.                                         | <input type="radio"/> |
| Reflect and try again if the first attempt at making something fails.              | <input type="radio"/> |
| Persist in voluntary labor despite it being arduous.                               | <input type="radio"/> |
| Consider the extra money from discounted class purchases as a personal errand fee. | <input type="radio"/> |
| Wear clothes to their fullest extent, avoiding wastefulness in dressing.           | <input type="radio"/> |
| Serve the exact amount of food I can eat to avoid wastage.                         | <input type="radio"/> |
| Take care of cooking and laundry myself when parents are away.                     | <input type="radio"/> |

B10. What is your attitude towards the following statements? [Matrix Single Choice Question] \*

|                                                                                                                                              | Strongly agree        | Somewhat agree        | Unsure                | Somewhat disagree     | Strongly disagree     |
|----------------------------------------------------------------------------------------------------------------------------------------------|-----------------------|-----------------------|-----------------------|-----------------------|-----------------------|
| Participating in labor practice activities deepens my affinity for labor.                                                                    | <input type="radio"/> |
| Labor practice activities help me grow in ability and wisdom.                                                                                | <input type="radio"/> |
| I believe labor can create wealth.                                                                                                           | <input type="radio"/> |
| I believe labor can improve the quality of life.                                                                                             | <input type="radio"/> |
| I think "marrying well is better than working well."                                                                                         | <input type="radio"/> |
| I agree with the saying, "Every trade produces its leader."                                                                                  | <input type="radio"/> |
| I believe labor contracts should adhere to principles of legality, fairness, equality, voluntary agreement, negotiation, honesty, and trust. | <input type="radio"/> |
| Many labor tasks require friendly cooperation among peers.                                                                                   | <input type="radio"/> |
| As a family member, I have an obligation to undertake household chores.                                                                      | <input type="radio"/> |
| We should engage in labor that is supported by law and legitimate.                                                                           | <input type="radio"/> |
| Physical labor also requires continuous innovation and the development of new                                                                | <input type="radio"/> |

|                                                                                                                                            |   |   |   |   |   |
|--------------------------------------------------------------------------------------------------------------------------------------------|---|---|---|---|---|
| methods and technologies to improve productivity.                                                                                          |   |   |   |   |   |
| I believe that labor involves not only hands-on practice but also deep thinking and exploration of the techniques and principles involved. | ○ | ○ | ○ | ○ | ○ |
| The labor process isn't just about manual work; it requires us to flexibly apply various knowledge and skills to solve problems.           | ○ | ○ | ○ | ○ | ○ |
| Reflecting and reviewing after completing labor tasks contribute to the accumulation of labor wisdom.                                      | ○ | ○ | ○ | ○ | ○ |
| Nothing is permanent without effort; only hard work yields results.                                                                        | ○ | ○ | ○ | ○ | ○ |
| Being deceitful in labor is unethical.                                                                                                     | ○ | ○ | ○ | ○ | ○ |
| When labor tools are uncomfortable, I try to improve them.                                                                                 | ○ | ○ | ○ | ○ | ○ |
| I believe knowledge of circuits and safety is essential before repairing appliances.                                                       | ○ | ○ | ○ | ○ | ○ |
| I feel embarrassed when parents take home leftover food from a family meal.                                                                | ○ | ○ | ○ | ○ | ○ |
| I think the act of inducing vomiting after binge-eating for internet fame is a wasteful behavior.                                          | ○ | ○ | ○ | ○ | ○ |

B11. What's your opinion about Xiao Wang's view that in a modern society with widespread use of cleaning robots and washing machines, performing these replaceable tasks is redundant? [Single Choice Question] \*

- ☐ I disagree with Xiao Wang; sweeping and washing are not the ultimate goals, but ways to develop our own abilities.
- ☐ Xiao Wang's view is somewhat one-sided; we should master these skills for situations when we need to do these tasks manually.
- ☐ It doesn't matter to me; I think doing these tasks manually or using machines makes no difference and doesn't affect me.
- ☐ I agree with Xiao Wang and believe these tasks are redundant and a waste of time.

B12. Li Lei, a university student, works in the cafeteria washing dishes as part of a work-study program. How do you view this? [Single Choice Question] \*

- ☐ I think his behavior is admirable and I plan to participate in work-study activities too.
- ☐ I commend his actions but wouldn't join a work-study program myself.
- ☐ It's irrelevant to me.
- ☐ I look down on him and think working in the cafeteria is embarrassing.

B13. If your teacher assigns you and Xiao Wang to create a blackboard report together, and Xiao Wang has experience while you are a novice, what would you do? [Single Choice Question] \*

- ☐ Learn from Xiao Wang and work together on the blackboard report.
- ☐ Actively help Xiao Wang gather materials and assist him in creating the report.
- ☐ Wait for Xiao Wang to ask for help before offering assistance.
- ☐ I believe the more capable should do more work, so Xiao Wang can handle it alone.

B14. When Xiao Li is buying equipment, the seller offers a 10% kickback if he buys their products. What should Xiao Li do? [Single Choice Question] \*

- ☐ Refuse the kickback and advise the seller that offering kickbacks is illegal.

- ☐ Refuse the kickback and choose the product based on quality and cost-effectiveness.
- ☐ Accept the kickback and submit it to the company to help reduce costs.
- ☐ Accept the kickback, reasoning that it's a waste not to take it.

B15. The teacher informs the students a week in advance that they will be learning woodworking next week and asks them to prepare. What will you do? [Single Choice Question] \*

- ☐ Study the relevant knowledge thoroughly and practice the required skills multiple times before the class.
- ☐ Acquire basic knowledge and skills; no need for extensive practice, as I can practice in class.
- ☐ Briefly review the relevant knowledge and watch operation videos; no need for hands-on practice.
- ☐ No preparation needed; I will learn during the class.
